# Supplementary material for: Positron emission tomography imaging of the sodium iodide symporter senses real-time energy stress in vivo
Source: Springer Nature journal article supplement (doi:10.1186/s40170-023-00314-2), 2023-09-07
Supplement: MOESM1 [file 40170_2023_314_MOESM1_ESM.pdf]

Supplementary Figure 1

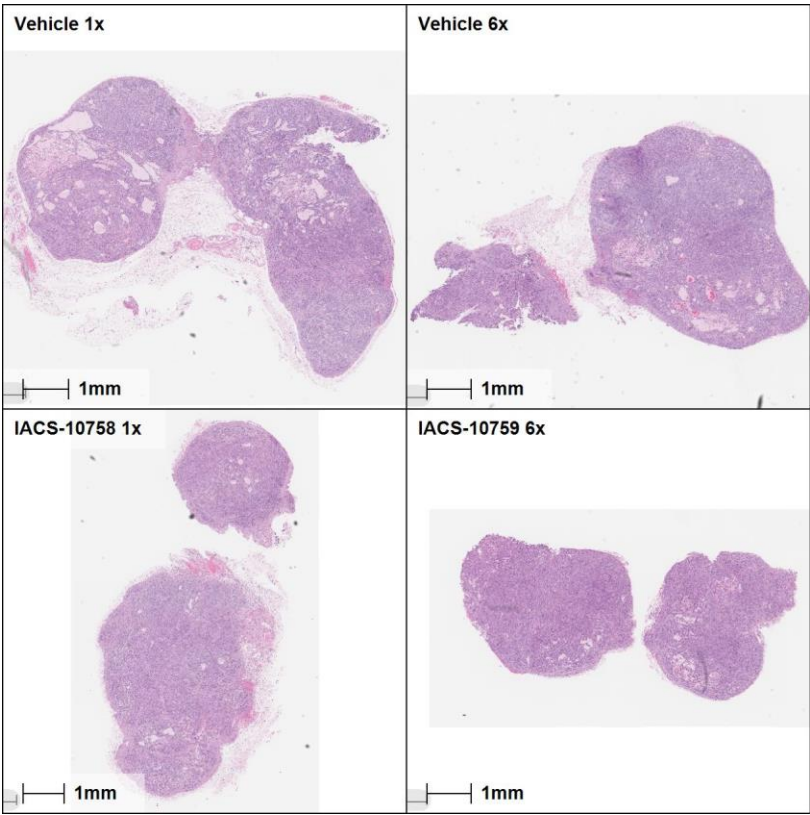

**Supplementary Figure 1.**

Illustrative images showing H&E staining of tumour tissue fixed shortly after the completion of vehicle or IACS-10759 treatment, as stated on the label in the left-hand corner of the image (Vehicle<sub>1x</sub>, IACS<sub>1x</sub>: fixed 2 hours from the administration of a single dose; Vehicle<sub>6x</sub>, IACS<sub>6x</sub>: fixed 24 hours from the administration of the last one of six, once-daily doses).

Supplementary Figure 2

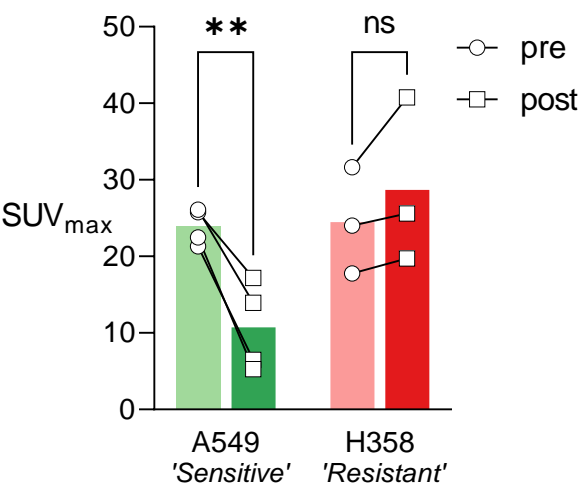

Supplementary Figure 2.

[<sup>18</sup>F]TFB PET imaging of sodium iodide symporter (NIS) expressing sensitive (A549-LN; n = 4) and resistant (H358-LN; n = 3) tumours at baseline and 24 hours later, immediately after oral administration of a single dose of 20mg/kg IACS-10759. Two-way, repeated measures ANOVA with Šídák's multiple comparisons analysis was performed to test statistical significance of the results. P value classifications are summarized as follows: \*\*, P<(0.001–0.01 ). Each data point represents SUV<sub>max</sub> calculated for a single tumour/animal and time-point.
